# Supplementary material
Source: Research Square preprint supplement (doi:10.21203/rs.3.rs-10022929/v1)
Supplement: Supplementary file 1 [file 552f6c4a6c44047e09cd8c61.docx]

Appendices

Appendix A. Append Demographic profile

| Category | Subcategory |
| --- | --- |
| Gender | Female |
|  | Male |
| Age group | 18 – 25 years |
|  | 26–49 years |
|  | 50 years or older |
| Education background | High school or similar |
|  | Bachelor’s or equivalent |
|  | Master’s or Ph.D. |
| Sector | Banking and Finance |
|  | Industry |
|  | Education |
|  | Government and Public Services |
|  | Healthcare |
|  | Other |

Appendix B. Measurement Items for Study Constructs

| **Construct** | **Code** | **Measurement Item** | **Source** |
| --- | --- | --- | --- |
| **Responsible AI Perception (RAI)** | RAI1 | AI cybersecurity systems operate in an ethical manner. |  |
|  | RAI2 | These systems are transparent in how they make decisions. | (Ammah et al., 2024; Chedrawi et al., 2025; Floridi et al., 2018; Shin, 2021) |
|  | RAI3 | AI tools respect user privacy and data protection. |  |
|  | RAI4 | AI systems avoid bias and discrimination. |  |
|  | RAI5 | Organizations ensure accountability in AI systems. |  |
|  | RAI6 | AI cybersecurity systems are developed responsibly. |  |
| **AI-Driven Cybersecurity Awareness** | AICA1 | I understand how AI-based cybersecurity systems work. | (Kruger et al., 2006; Parsons et al., 2017) |
|  | AICA2 | I know how AI improves cybersecurity threat detection. |  |
|  | AICA3 | I understand the limitations of AI in cybersecurity. |  |
|  | AICA4 | I am aware of common cybersecurity threats such as phishing and malware. |  |
|  | AICA5 | I can identify suspicious online activities or messages. |  |
|  | AICA6 | I regularly follow cybersecurity best practices. |  |
|  | AICA7 | I stay informed about emerging cybersecurity risks and solutions. |  |
|  | AICA8 | I understand how AI contributes to protecting digital systems. |  |
| **Perceived Risk (PR)** | PR1 | Using AI-based cybersecurity systems involves potential risks. |  |
|  | PR2 | I am concerned about privacy risks when using AI cybersecurity tools. | (Featherman & Pavlou, 2003; Kim et al., 2008) |
|  | PR3 | I feel that AI systems may misuse my personal data. |  |
|  | PR4 | There is uncertainty in relying on AI cybersecurity systems. |  |
|  | PR5 | Errors in AI systems could cause serious problems. |  |
|  | PR6 | I feel vulnerable when relying on AI cybersecurity technologies. |  |
| **Prior Experience with Breaches (PEB)** | PEB1 | I have experienced a cybersecurity breach before. | (Ifinedo et al., 2024) |
|  | PEB2 | I have lost data due to a cyberattack. |  |
|  | PEB3 | I have dealt with unauthorized access to my accounts. |  |
|  | PEB4 | I have faced security issues that affected my trust in technology. |  |
| **Trust in AI-Based Cybersecurity Systems (TRUST)** | TRUST1 | I trust AI-based cybersecurity systems to perform reliably. | (Gefen et al., 2003; McKnight et al., 2002) |
|  | TRUST2 | I believe AI cybersecurity systems are dependable. |  |
|  | TRUST3 | I feel confident in decisions made by AI systems. |  |
|  | TRUST4 | AI-based cybersecurity systems are trustworthy. |  |
|  | TRUST6 | I rely on AI cybersecurity systems for protecting my digital assets. |  |
| **Digital literacy (TL)** | TL1 | I can troubleshoot basic Digitalproblems. | (Elmy & Jizat, 2012; Fraillon & Duckworth, 2025) |
|  | TL2 | I understand how cybersecurity tools work. |  |
|  | TL3 | I can configure security settings on my devices. |  |
|  | TL4 | I am comfortable using advanced digital technologies. |  |
|  | TL5 | I can identify potential security vulnerabilities. |  |
|  | TL6 | I can evaluate the effectiveness of cybersecurity tools. |  |
|  | TL7 | I am skilled at managing my online security. |  |
|  | TL8 | I can use AI-based tools confidently. |  |
| **Behavioral Intention to Use (BI)** | BI1 | I intend to use AI-based cybersecurity systems in the future. | Davis, 1989; Venkatesh et al., 2003 |
|  | BI2 | I will frequently use AI cybersecurity tools when available. |  |
|  | BI3 | I plan to adopt AI cybersecurity systems for use. |  |
|  | BI4 | I would recommend AI cybersecurity systems to others. |  |
|  | BI5 | I am willing to depend on AI systems for cybersecurity protection. |  |
|  | BI6 | I expect to increase my use of AI cybersecurity systems. |  |
